# Supplementary material
Source: HighWire-hosted journal article supplement (http://www.cmaj.ca/highwire/filestream/58171/field_highwire_adjunct_files/0/estimate-brisson-online_appendix_1.pdf)
Supplement: estimate-brisson-online_appendix_1.pdf [file estimate-brisson-online_appendix_1.pdf]

**Appendix 1: Type- and age-specific parameters for the natural history of human papillomavirus (HPV) infection used in the mathematical model to predict the number needed to vaccinate to prevent HPV-related diseases and death**

| Variable                                                                        | HPV type; prior parameter ranges* |           |                           |                    |               | HPV type; posterior parameter ranges† |           |                           |                    |
|---------------------------------------------------------------------------------|-----------------------------------|-----------|---------------------------|--------------------|---------------|---------------------------------------|-----------|---------------------------|--------------------|
|                                                                                 | Type 16                           | Type 18   | Other high oncogenic risk | Low oncogenic risk | References‡   | Type 16                               | Type 18   | Other high oncogenic risk | Low oncogenic risk |
| <b>HPV infection</b>                                                            |                                   |           |                           |                    |               |                                       |           |                           |                    |
| Force of HPV infection, per woman-year                                          | 0.00-0.14                         | 0.00-0.04 | 0.00-0.28                 | 0.00-0.28          | 1-9           | 0.01-0.11                             | 0.00-0.03 | 0.02-0.21                 | 0.02-0.23          |
| Clearance of HPV infection, per woman-year                                      | 0.08-1.54                         | 0.08-1.71 | 0.33-2.06                 | 0.61-4.29          | 2-7,10,11     | 0.24-1.18                             | 0.32-1.43 | 0.50-1.74                 | 0.94-3.65          |
| Natural immunity following infection, %                                         | 0-100                             | 0-100     | NA                        | NA                 | –¶            | 18-90                                 | 18-90     | NA                        | NA                 |
| <b>Cervical intraepithelial neoplasia, per woman-year</b>                       |                                   |           |                           |                    |               |                                       |           |                           |                    |
| Progression of HPV infection to grade 1 cervical intraepithelial neoplasia      | 0.01-0.18                         | 0.01-0.18 | 0.02-0.18                 | 0.02-0.29          | 2,3,6,8,11-13 | 0.03-0.13                             | 0.03-0.13 | 0.03-0.14                 | 0.04-0.21          |
| Progression of HPV infection to grade 2 or 3 cervical intraepithelial neoplasia | 0.00-0.21                         | 0.00-0.21 | 0.00-0.10                 | 0.00-0.01          | 3,9,11,12     | 0.01-0.13                             | 0.01-0.12 | 0.00-0.07                 | 0.00-0.01          |
| Progression of cervical intraepithelial neoplasia from grade 1 to grade 2 or 3  | 0.00-0.39                         | 0.00-0.39 | 0.00-0.39                 | 0.00-0.04          | 3,13-15       | 0.03-0.26                             | 0.03-0.23 | 0.04-0.25                 | 0.00-0.03          |
| Clearance of grade 1 cervical intraepithelial neoplasia                         | 0.06-1.75                         | 0.06-1.75 | 0.22-2.62                 | 0.28-4.36          | 3,13-15       | 0.15-1.30                             | 0.18-1.24 | 0.40-2.06                 | 0.59-3.15          |
| Clearance of grade 2 or 3 cervical intraepithelial neoplasia                    | 0.04-1.15                         | 0.04-1.15 | 0.15-1.73                 | 0.15-2.88          | 3,13-15       | 0.12-0.87                             | 0.13-0.92 | 0.29-1.39                 | 0.37-2.14          |
| Regression of grade 1 cervical intraepithelial neoplasia to HPV infection       | 0.06-1.00                         | 0.06-1.00 | 0.06-1.00                 | 0.06-1.00          | –¶            | 0.17-0.75                             | 0.15-0.71 | 0.14-0.76                 | 0.15-0.75          |
| Regression of grade 2 or 3 cervical intraepithelial neoplasia to HPV infection  | 0.00-1.00                         | 0.00-1.00 | 0.00-1.00                 | 0.00-1.00          | –¶            | 0.04-0.65                             | 0.05-0.65 | 0.05-0.65                 | 0.05-0.65          |
| Regression of cervical intraepithelial neoplasia from grade 2 or 3 to grade 1   | 0.00-0.30                         | 0.00-0.30 | 0.00-0.30                 | 0.00-0.30          | –¶            | 0.01-0.20                             | 0.01-0.20 | 0.01-0.20                 | 0.01-0.21          |
| <b>Genital warts§</b>                                                           |                                   |           |                           |                    |               |                                       |           |                           |                    |
| Progression from HPV infection to genital warts, %                              | NA                                | NA        | NA                        | 0-79               | 16            | NA                                    | NA        | NA                        | 31-71              |

Note: NA = not available.

\*Minimum and maximum of the age-specific prior parameter ranges.

†10th and 90th percentiles of the age-specific posterior parameter ranges. Posterior parameter sets were identified during model fitting; parameter sets were judged to produce “acceptable” fit if the associated model predictions fell simultaneously within prespecified targets defined using epidemiologic data specific to North America for prevalence and annual incidence of HPV, genital warts, cervical intraepithelial neoplasia and cervical cancer.

‡See page 2 of this appendix for a list of the references.

§Natural history parameters for genital warts were fitted to the age-specific data in Insinga et al.<sup>17</sup>

¶Assumption (parameter values were not available from the literature review).

## References

1. Thomas KK, Hughes JP, Kuypers JM, et al. Concurrent and sequential acquisition of different genital human papillomavirus types. *J Infect Dis* 2000;182:1097-102.
2. Woodman CB, Collins S, Winter H, et al. Natural history of cervical human papillomavirus infection in young women: a longitudinal cohort study. *Lancet* 2001;357:1831-6.
3. Dalstein V, Riethmuller D, Pretet JL, et al. Persistence and load of high-risk HPV are predictors for development of high-grade cervical lesions: a longitudinal French cohort study. *Int J Cancer* 2003;106:396-403.
4. Franco EL, Villa LL, Sobrinho JP, et al. Epidemiology of acquisition and clearance of cervical human papillomavirus infection in women from a high-risk area for cervical cancer. *J Infect Dis* 1999;180:1415-23.
5. Ho GY, Bierman R, Beardsley L, et al. Natural history of cervicovaginal papillomavirus infection in young women. *N Engl J Med* 1998;338:423-8.
6. Moscicki AB, Hills N, Shiboski S, et al. Risks for incident human papillomavirus infection and low-grade squamous intraepithelial lesion development in young females. *JAMA* 2001;285:2995-3002.
7. Richardson H, Kelsall G, Tellier P, et al. The natural history of type-specific human papillomavirus infections in female university students. *Cancer Epidemiol Biomarkers Prev* 2003;12:485-90.
8. Syrjänen S, Shabalova I, Petrovichev N, et al. Acquisition of high-risk human papillomavirus infections and pap smear abnormalities among women in the New Independent States of the Former Soviet Union. *J Clin Microbiol* 2004;42:505-11.
9. Winer RL, Lee SK, Hughes JP, et al. Genital human papillomavirus infection: incidence and risk factors in a cohort of female university students. *Am J Epidemiol* 2003;157:218-26.
10. Brown DR, Shew ML, Qadadri B, et al. A longitudinal study of genital human papillomavirus infection in a cohort of closely followed adolescent women. *J Infect Dis* 2005;191:182-92.
11. Kotloff KL, Wasserman SS, Russ K, et al. Detection of genital human papillomavirus and associated cytological abnormalities among college women. *Sex Transm Dis* 1998;25:243-50.
12. Schlecht NF, Kulaga S, Robitaille J, et al. Persistent human papillomavirus infection as a predictor of cervical intraepithelial neoplasia. *JAMA* 2001;286:3106-14.
13. Schlecht NF, Platt RW, Duarte-Franco E, et al. Human papillomavirus infection and time to progression and regression of cervical intraepithelial neoplasia. *J Natl Cancer Inst* 2003;95:1336-43.
14. Nobbenhuis MA, Walboomers JM, Helmerhorst TJ, et al. Relation of human papillomavirus status to cervical lesions and consequences for cervical-cancer screening: a prospective study. *Lancet* 1999;354:20-5.
15. Holowaty P, Miller AB, Rohan T, et al. Natural history of dysplasia of the uterine cervix. *J Natl Cancer Inst* 1999;91:252-8.
16. Winer RL, Kiviat NB, Hughes JP, et al. Development and duration of human papillomavirus lesions, after initial infection. *J Infect Dis* 2005;191:731-8.
17. Insinga RP, Dasbach EJ, Myers ER. The health and economic burden of genital warts in a set of private health plans in the United States. *Clin Infect Dis* 2003;36:1397-403.
